# Supplementary material
Source: HighWire-hosted journal article supplement (https://www.annfammed.org/highwire/filestream/14334/field_highwire_adjunct_files/0/Raj.pdf)
Supplement: Raj.pdf [file Raj.pdf]

## Supplemental material for:

Raj M, Iott B, Anthony D, Platt J. Family caregivers' experiences with telehealth during COVID-19: insights from Michigan. *Ann Fam Med*. 2022;20(1):69-71.

## Supplemental Appendix

### Understanding family caregivers' experiences through COVID-19

1. What is your relationship to the older adult for whom you provide the most care? You are their...
  - a. Adult child/child-in-law
  - b. Adult grandchild/in-law
  - c. Spouse/partner
  - d. Niece/nephew
  - e. Sibling
  - Other
2. What is your older relative's age in years?
3. Does your older relative live with you?
  - a. Yes
  - b. Part-time
  - c. No
4. If no (#3), where do they live?
  - a. In their own home
  - b. In a long-term care facility
  - c. In a retirement community
  - d. With another caregiver
  - e. Other (please describe)
5. Think about the older relative you provide the most care for. About how many hours per week do you spend in an average week providing care?
  - a. 0-10
  - b. 11-20
  - c. 21-30
  - d. 31-40
  - e. 40+
6. Does the older relative you provide the most care for also have any of the following conditions (please select all that apply):
  - a. Cancer
  - b. Alzheimer's, confusion, dementia, memory loss
  - c. Orthopedic/musculoskeletal conditions
  - d. Mental health/behavioral/substance use issues
  - e. Chronic conditions other than cancer (e.g., COPD, heart disease, diabetes)
  - f. Neurological/developmental issues
  - g. Acute conditions
  - h. Normal aging
7. Does your older relative have a computer or mobile device (smartphone, tablet)?
  - a. Yes

- b. No
  - c. I'm not sure
- 8. Does your older relative have internet access in their home or in another convenient location?
  - a. Yes
  - b. No
  - c. I'm not sure
- 9. When your older relative uses the internet, do they access it through (please select all that apply):
  - a. Dial up internet
  - b. Broadband (DSL, cable, FiOS)
  - c. A cellular network (phone, 3G/4G)
  - d. A wireless network (wi-fi)
- 10. Do you have a computer or mobile device (smartphone, tablet)?
  - a. Yes
  - b. No
- 11. Do you have internet access in your home or in another convenient location?
  - a. Yes
  - b. No
- 12. When you use the internet, do you access it through (please select all that apply):
  - a. Dial up internet
  - b. Broadband (DSL, cable, FiOS)
  - c. A cellular network (phone, 3G/4G)
  - d. A wireless network (wi-fi)
- 13. How comfortable are you in using technology (like the online medical record) to help your older relative manage their health?
  - a. Not at all comfortable
  - b. Somewhat comfortable
  - c. Fairly comfortable
  - d. Very comfortable
- 14. Has your older relative had any telehealth/telemedicine visits since the onset of the Covid-19 pandemic?
  - a. Yes
  - b. No
  - c. I'm not sure
- 15. How many visits have your older relative had since the onset of the Covid-19 pandemic, by telemedicine?
  - a. 1-3
  - b. 4-6
  - c. 7 or more
  - d. I'm not sure
- 16. Who was this visit with?
  - a. General doctor (also called a primary care physician or internist)
  - b. Another provider (e.g., nurse practitioner, physician's assistant) in their general doctor's office
  - c. Specialist doctor (e.g., cardiologist, endocrinologist)
  - d. Another provider (e.g., nurse practitioner, physician's assistant) in their specialist doctor's office
  - e. Mental health care provider (e.g., psychiatrist)
  - f. Mental health care provider (e.g., psychologist, social worker)
  - g. I'm not sure
- 17. What was the **main purpose** of your older relative's most recent telemedicine visit?

- a. Wellness visit
  - b. Visit for a new health concern
  - c. Visit to manage a chronic or ongoing condition
  - d. Visit to request a prescription renewal
  - e. End of life
  - f. I'm not sure
  - g. Other (please describe)
18. Did you participate in the visit?
- a. Yes
  - b. No
19. If yes (#18), how did you participate?
- a. My relative called in from one line and I called in from a separate line (phone only, no video)
  - b. My relative called in from one line and I called in from a separate line (video)
  - c. Sat with my older relative and we called the doctor from the same line (phone only, no video)
  - d. Sat with my older relative and we called the doctor from the same line (video)
20. If yes (#18), how comfortable was your relative with you joining in the telemedicine visit?
- a. Not at all comfortable
  - b. Somewhat comfortable
  - c. Fairly comfortable
  - d. Very comfortable
21. If yes (#18), what device did you use to make telemedicine calls?
- a. Smartphone (iPhone, Samsung Galaxy, Android phone)
  - b. Basic cellphone
  - c. Landline Phone
  - d. Computer/laptop
  - e. Tablet computer (iPad, Microsoft Surface)
  - f. I didn't participate
22. What device did your relative use to make telemedicine calls?
- a. Smartphone (iPhone, Samsung Galaxy, Android phone)
  - b. Basic cellphone
  - c. Landline Phone
  - d. Computer/laptop
  - e. Tablet computer (iPad, Microsoft Surface)
  - f. I'm not sure
  - g. My relative called in with me
23. How difficult is it for you to access your relative's telemedicine visits?
- a. Not at all difficult
  - b. Somewhat difficult
  - c. Fairly difficult
  - d. Very difficult
24. Do you have any concerns about using telemedicine to communicate with your relative's healthcare provider?
- a. No
  - b. Yes (please describe)
25. Do you have comments to add about your experience or thoughts about telemedicine as it relates to being a family caregiver during the Covid-19 pandemic? (Open-ended)
26. What is your age (in years)?
27. What is your gender?

- a. Woman
  - b. Man
  - c. Non-binary
  - d. Prefer not to disclose
  - e. Prefer to self-describe
28. What race do you consider yourself to be? Please select all that apply.
- a. White
  - b. Black or African American
  - c. Middle Eastern or Arab American
  - d. Chinese
  - e. Filipino
  - f. Asian Indian
  - g. Vietnamese
  - h. Korean
  - i. Japanese
  - j. Other Asian (e.g. Pakistani, Cambodian, Hmong, etc.)
  - k. Native Hawaiian or Other Pacific Islander
  - l. American Indian or Alaska Native
  - m. Other (please enter race or origin)
29. Do you consider yourself Hispanic or Latino?
- a. Yes
  - b. No
30. How would you rate your health before the onset of the Covid-19 pandemic?
- a. Poor
  - b. Fair
  - c. Good
  - d. Very good
  - e. Excellent
31. How would you rate your health now, since the onset of the Covid-19 pandemic?
- a. Poor
  - b. Fair
  - c. Good
  - d. Very good
  - e. Excellent
